# Supplementary material for: Healthful Plant-Based Diet and Incidence of Type 2 Diabetes in Asian Population
Source: MDPI journal article supplement (doi:10.3390/nu14153078), 2022-07-27
Supplement: s1 [file s1]

**Table S1.** Classification of food items in the Korean Genome and Epidemiology Study (KoGES)<sup>1</sup>

| Food groups                     | Items in the food frequency questionnaire                                                                                                                                                                                                                                                                                                                                                                                                                          |
|---------------------------------|--------------------------------------------------------------------------------------------------------------------------------------------------------------------------------------------------------------------------------------------------------------------------------------------------------------------------------------------------------------------------------------------------------------------------------------------------------------------|
| <b>Healthy plant foods</b>      |                                                                                                                                                                                                                                                                                                                                                                                                                                                                    |
| Whole grains                    | Mixed grains, barley, grain with beans                                                                                                                                                                                                                                                                                                                                                                                                                             |
| Fruits                          | Strawberry, watermelon, banana, peach/ plum, oriental melon/melon, persimmon/dried persimmon, pear/pear juice, tangerine, orange/orange juice, apple/apple juice, grape/grape juice                                                                                                                                                                                                                                                                                |
| Vegetables                      | Sweet potatoes, radish, napa cabbage/napa cabbage soup, spinach, lettuce, perilla leaves, sesame leaves/vegetable salad, other green vegetable, Deodeok/bellflower root, bean sprouts/mung-bean sprouts, bracken/sweet potato stem, oyster mushroom, other mushrooms, green pepper leaf/chamnamul, crown daisy /chive /watercress, cucumber, carrot/carrot juice, onion, green peppers, zucchini, pumpkin/kabocha squash, laver, kelp/seaweed, tomato/tomato juice |
| Nuts                            | Peanuts/almonds/pine nuts                                                                                                                                                                                                                                                                                                                                                                                                                                          |
| Legumes                         | Beans/beans cooked in soy sauce, tofu, bean curd, soybean milk                                                                                                                                                                                                                                                                                                                                                                                                     |
| Tea and coffee                  | Coffee, green tea                                                                                                                                                                                                                                                                                                                                                                                                                                                  |
| <b>Less healthy plant foods</b> |                                                                                                                                                                                                                                                                                                                                                                                                                                                                    |
| Refined grains                  | White rice, instant noodles, other noodles (udon noodles), black bean sauce noodles, cold noodles, rice cake/rice cake soup, other rice cakes, refined cereals, white breads, other breads, grain powder, starch jelly, stir-fried noodles and vegetables                                                                                                                                                                                                          |
| Potatoes                        | Potatoes (steamed, french fries, soup, fried potato pancake)                                                                                                                                                                                                                                                                                                                                                                                                       |
| Sugar sweetened beverages       | soft drink, other beverages (sweetened rice tea, citron tea)                                                                                                                                                                                                                                                                                                                                                                                                       |
| Sweets and desserts             | Sweet red bean bread, cake/chocolate pie, cookies/crackers/snacks, candies/chocolates, sugars (added to tea or coffee)                                                                                                                                                                                                                                                                                                                                             |
| Salty food group                | Bean paste, Bean paste/bean paste soup, Kimchi (Korean cabbage, radish), watery radish kimchi, other kimchi, pickled vegetable (preserved in soy sauce or salt), radish kimchi (preserved in soy sauce or salt)                                                                                                                                                                                                                                                    |
| <b>Animal foods</b>             |                                                                                                                                                                                                                                                                                                                                                                                                                                                                    |
| Animal fat                      | Butter, cream (added to tea or coffee)                                                                                                                                                                                                                                                                                                                                                                                                                             |
| Dairy                           | Milk, yogurt/yoplait, ice cream, cheese                                                                                                                                                                                                                                                                                                                                                                                                                            |
| Eggs                            | Eggs/quail eggs                                                                                                                                                                                                                                                                                                                                                                                                                                                    |
| Fish                            | Sashimi, belt fish, mackrele/pacific saury, eel, yellow croaker/sea bream/sole, alaska pollack/frozen pollack/dried pollack, squid/dried squid/octopus, anchovy/stir-fried anchovy, canned tuna, salted shrimp/salted fish, clam/sea snail, oyster, crab/marinated crab, shrimp, fishcake                                                                                                                                                                          |
| Meat                            | Pork belly, grilled pork/stir-fried pork/pork bulgogi/Korean meatball, steamed pork, processed meat (ham,sausage), organ meat/Korean sausage, steak/grilled beef, dog meat, beef soup, chicken(fried, stew, braised spicy chicken), beef stew                                                                                                                                                                                                                      |
| Miscellaneous animal foods      | dumplings/dumpling soup, pizza/hamburger                                                                                                                                                                                                                                                                                                                                                                                                                           |

<sup>1</sup> The PDI, hPDI, and uPDI categorized food groups to “healthy plant foods,” “less healthy plant foods,” and “animal foods.”

PDI, overall plant-based diet index; hPDI, healthful plant-based diet index; uPDI, unhealthful plant-based diet index
